# Supplementary material for: Birnessite-type manganese oxides nanosheets with hole acceptor assisted photoelectrochemical activity in response to visible light
Source: Royal Society of Chemistry journal article supplement (doi:10.1039/c1jm14355g), 2011-12-20
Supplement: c1jm14355g.pdf [file c1jm14355g.pdf]

## Electronic Supplementary Information

### Birnessite-type Manganese Oxides Nanosheets with Hole Acceptor Assisted Photoelectrochemical Activity in Response to Visible Light

Yu-Kuei Hsu,<sup>1</sup> Yan-Gu Lin,<sup>2</sup> Ying-Chu Chen,<sup>2</sup> Li-Chyong Chen,<sup>2,\*</sup> and Kuei-Hsien Chen<sup>3</sup>,

<sup>1</sup> Department of Opto-Electronic Engineering, National Dong Hwa University,  
Hualien, 97401, Taiwan

<sup>2</sup> Center for Condensed Matter Sciences, National Taiwan University, Taipei, No. 1,  
Sec. 4, Roosevelt Road, Taipei, 10617 Taiwan

<sup>3</sup> Institute of Atomic and Molecular Science, Academia Sinica, Taipei

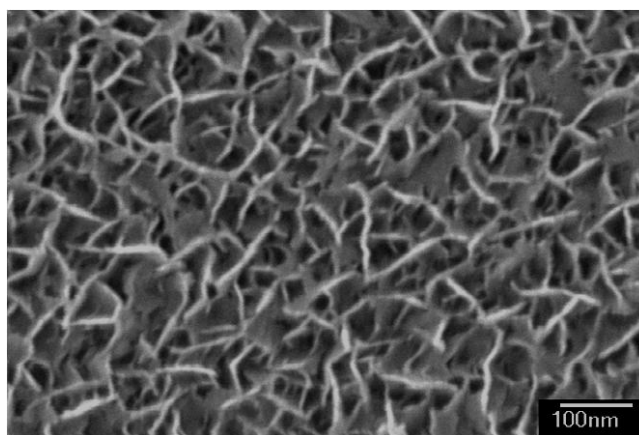

Figure S1 SEM top-view image of hierarchically structured nanosheets deposited on ITO by means of anodic electroplating at a current density of  $0.25 \text{ mA/cm}^2$  for 250s.

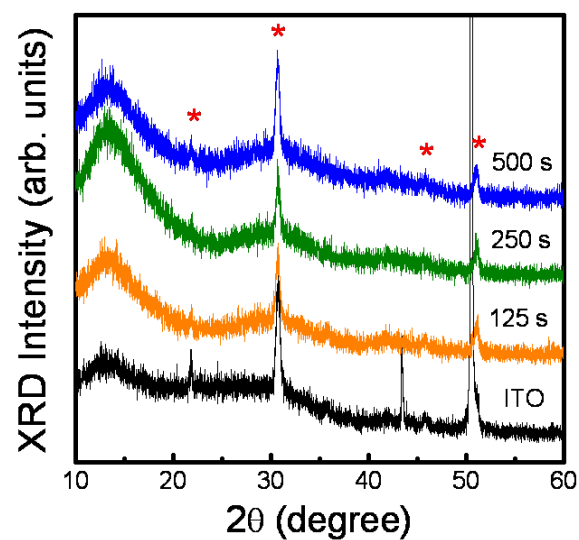

Figure S2 XRD patterns of MnO<sub>2</sub> nanosheets, fabricated via anodic electrodeposition, for different deposition times.

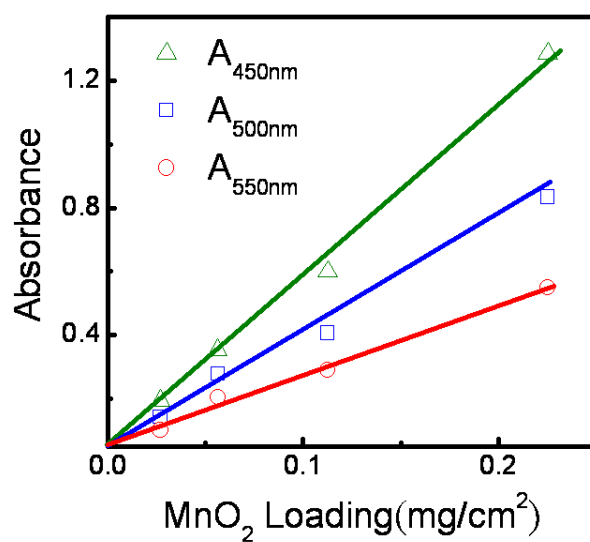

Figure S3 Absorbance at 450, 500 and 550 nm as a function of MnO<sub>2</sub> nanosheets deposit.

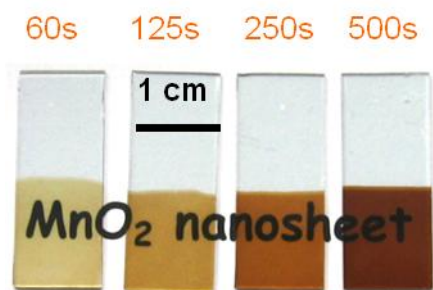

Figure S4 Photographs of MnO<sub>2</sub> nanosheets on ITO.

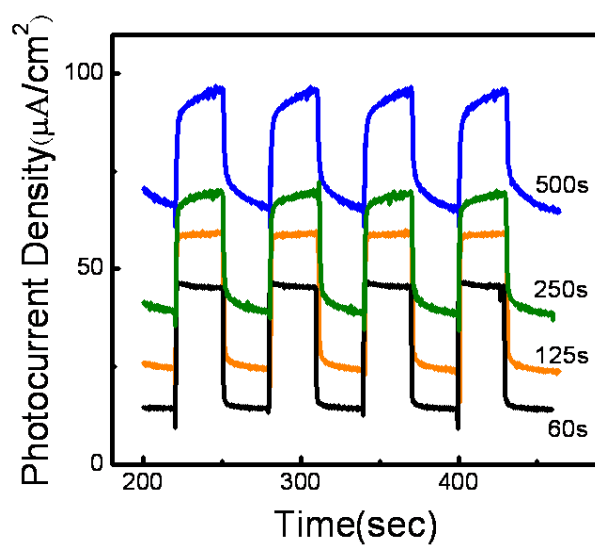

Figure S5 Photocurrent-time behaviour of MnO<sub>2</sub> nanosheets with different deposition times in the presence of methanol.
